# Supplementary material for: Enhancing title and abstract screening for systematic reviews with GPT-3.5 turbo
Source: PubMed Central journal article supplement — BMJ Evid Based Med. 2023 Nov 21;29(1):69–70. doi: 10.1136/bmjebm-2023-112678 (PMC10850650; doi:10.1136/bmjebm-2023-112678), 2023-11-21
Supplement: bmjebm-2023-112678supp001.pdf [file bmjebm-2023-112678supp001.pdf]

Supplementary table 1. Prompts text

| Prompt number | Prompt text                                                                                                                                                                                                                                                                                                                                                                                                                                                                                                                                                                                                                                                                                                                                                                                                                                                                      |
|---------------|----------------------------------------------------------------------------------------------------------------------------------------------------------------------------------------------------------------------------------------------------------------------------------------------------------------------------------------------------------------------------------------------------------------------------------------------------------------------------------------------------------------------------------------------------------------------------------------------------------------------------------------------------------------------------------------------------------------------------------------------------------------------------------------------------------------------------------------------------------------------------------|
| 1             | <p>We are trying to conduct a PRISMA systematic review study titled:<br/>"Light therapy in insomnia disorder"</p> <p>Check the title and abstract if it should be selected for further assessment and full-text screening. Provide you answer only as 0 or 1.</p> <p>Our inclusion criteria are the followings:</p> <p>Criterion A<br/>Must have enrolled only patients who had been diagnosed with chronic insomnia disorder. We also include studies in which insomnia diagnosis was not based on proper classification criteria, but was based on "sleep troubles" including at least one insomnia complaint, without any other diagnosis of sleep disorder.</p> <p>Criterion B<br/>Studies assessing the efficacy of light therapy.</p> <p>Criterion C<br/>Publication written in English.</p> <p>Criterion D<br/>Study design could be observational or interventional.</p> |
| 2             | <p>We are trying to conduct a PRISMA systematic review study titled:<br/>"Light therapy in insomnia disorder"</p> <p>Check the title and abstract if it should be selected for further assessment and full-text screening. Provide you answer only as 0 or 1.</p> <p>Our inclusion criteria are the followings:</p> <p>Criterion A<br/>Studies including patients with sleep troubles.</p> <p>Criterion B<br/>Studies assessing the efficacy of light therapy.</p> <p>Criterion C<br/>Publication written in English.</p> <p>Criterion D<br/>Study design could be observational or interventional.</p>                                                                                                                                                                                                                                                                          |
| 3             | <p>You are an experienced systematic review researcher and you are trying to conduct a</p>                                                                                                                                                                                                                                                                                                                                                                                                                                                                                                                                                                                                                                                                                                                                                                                       |

|   |                                                                                                                                                                                                                                                                                                                                                                                                                                                                                                                                                                                                                                                                                                                                                                                  |
|---|----------------------------------------------------------------------------------------------------------------------------------------------------------------------------------------------------------------------------------------------------------------------------------------------------------------------------------------------------------------------------------------------------------------------------------------------------------------------------------------------------------------------------------------------------------------------------------------------------------------------------------------------------------------------------------------------------------------------------------------------------------------------------------|
|   | <p>PRISMA systematic review and meta-analysis titled:<br/>"Light therapy in insomnia disorder"</p> <p>Check the title and abstract if it should be selected for further assessment and full-text screening. Provide you answer only as 0 or 1.</p> <p>Our inclusion criteria are the followings:<br/>Criterion A<br/>Studies including patients with sleep troubles.<br/>Criterion B<br/>Studies assessing the efficacy of light therapy.<br/>Criterion C<br/>Publication written in English.<br/>Criterion D<br/>Study design could be observational or interventional.</p>                                                                                                                                                                                                     |
| 4 | <p>You are an experienced systematic review researcher and you are trying to conduct a PRISMA systematic review and meta-analysis titled:<br/>"Light therapy in insomnia disorder"</p> <p>Check the title and abstract if it should be selected for further assessment and full-text screening. Provide you answer only as 0 or 1.</p> <p>Our inclusion criteria are the followings:<br/>Criterion A<br/>Studies including patients with sleep troubles.<br/>Criterion B<br/>Studies assessing the efficacy of light therapy.<br/>Criterion C<br/>Publication written in English.<br/>Criterion D<br/>Study design could be observational or interventional.</p> <p>If the title and abstract were not clear about criterion A, B or D it is preferred to include the study.</p> |
| 5 | <p>Title: "Light therapy in insomnia disorder"</p> <p>You are conducting a PRISMA systematic review and meta-analysis to assess the efficacy of light therapy in patients with insomnia disorder. Your goal is to identify as many relevant studies as possible to ensure a comprehensive review.</p> <p>Check the title and abstract if it should be selected</p>                                                                                                                                                                                                                                                                                                                                                                                                               |

|   |                                                                                                                                                                                                                                                                                                                                                                                                                                                                                                                                                                                                                                                                                                                          |
|---|--------------------------------------------------------------------------------------------------------------------------------------------------------------------------------------------------------------------------------------------------------------------------------------------------------------------------------------------------------------------------------------------------------------------------------------------------------------------------------------------------------------------------------------------------------------------------------------------------------------------------------------------------------------------------------------------------------------------------|
|   | <p>for further assessment and full-text screening.</p> <p>Inclusion Criteria:</p> <p>Criterion A<br/>Studies involving patients with any form of sleep disturbances or insomnia disorder, regardless of sleep disorder diagnoses.</p> <p>Criterion B<br/>Studies assessing the efficacy of light therapy.</p> <p>Criterion C<br/>Publications written in English.</p> <p>Criterion D<br/>Study design could be observational or interventional.</p> <p>Your primary objective is to avoid missing any potentially relevant studies. If the title and abstract are not explicit about meeting the inclusion criteria, it is preferred to err on the side of inclusivity and include the study for further assessment.</p> |
| 6 | <p>You are an experienced systematic review researcher and you are trying to conduct a PRISMA systematic review and meta-analysis titled:<br/>"Light therapy in insomnia disorder"</p> <p>Check the title and abstract if it should be selected for further assessment and full-text screening. Provide you answer only as 0 or 1.</p> <p>You are looking for English original studies working on the effect of light therapy in patients with sleeping problems.<br/>It is important not to miss possible relevant studies.<br/>It is preferred to include studies you are not sure about them.</p> <p>Prompts made by GPT</p>                                                                                          |
| 7 | <p>You are an experienced systematic review researcher and you are trying to conduct a PRISMA systematic review and meta-analysis titled: "Light therapy in insomnia disorder."</p> <p>Check the title and abstract to determine if the study should be selected for further assessment and full-text screening.</p> <p>Your primary objective is to identify relevant studies on the effect of light therapy in patients with sleeping problems. You are looking for</p>                                                                                                                                                                                                                                                |

|   |                                                                                                                                                                                                                                                                                                                                                                                                                                                                                                                                                                                                                                                                                                                                                                                                                                                                                                                                                                                                                                                                                                                                                                                                                                                                                                                                                                                                                                                                                                                                                                                                                          |
|---|--------------------------------------------------------------------------------------------------------------------------------------------------------------------------------------------------------------------------------------------------------------------------------------------------------------------------------------------------------------------------------------------------------------------------------------------------------------------------------------------------------------------------------------------------------------------------------------------------------------------------------------------------------------------------------------------------------------------------------------------------------------------------------------------------------------------------------------------------------------------------------------------------------------------------------------------------------------------------------------------------------------------------------------------------------------------------------------------------------------------------------------------------------------------------------------------------------------------------------------------------------------------------------------------------------------------------------------------------------------------------------------------------------------------------------------------------------------------------------------------------------------------------------------------------------------------------------------------------------------------------|
|   | <p>English original studies focusing on this topic.</p> <p>Please be cautious and prioritize inclusivity. If the title and abstract hint at potential relevance, even if the criteria are not explicitly stated, include the study for further assessment.</p>                                                                                                                                                                                                                                                                                                                                                                                                                                                                                                                                                                                                                                                                                                                                                                                                                                                                                                                                                                                                                                                                                                                                                                                                                                                                                                                                                           |
| 8 | <p>You are an experienced systematic review researcher and you are trying to conduct a PRISMA systematic review and meta-analysis titled:</p> <p>"Light therapy in insomnia disorder"</p> <p>Based on the guideline below, check the title and abstract to determine if the study should be selected for further assessment and full-text screening.</p> <p>Provide your answer only as 0 or 1</p> <p>guideline:</p> <ol style="list-style-type: none"> <li>1. Does the title or abstract use English?       <ol style="list-style-type: none"> <li>a. Yes: continue screening</li> <li>b. No: stop screening</li> </ol> </li> <li>2. Does the title or abstract indicate that the study is original and not a review.       <ol style="list-style-type: none"> <li>a. Yes: continue screening</li> <li>b. No: stop screening</li> </ol> </li> <li>3. Does the abstract indicate that patients with sleep troubles were included.       <ol style="list-style-type: none"> <li>a. Yes or Unsure/Unclear: continue screening</li> <li>b. No: stop screening</li> </ol> </li> <li>4. Does the abstract indicate that any type of light therapy was studied?       <ol style="list-style-type: none"> <li>a. Yes, or Unsure/Unclear: continue screening</li> <li>b. No: stop screening</li> </ol> </li> </ol> <p>Decision: Should this article be included?</p> <ol style="list-style-type: none"> <li>a. Yes, all 4 screening questions answered Yes or Unclear</li> <li>b. No, at least one answers definitely "No"</li> </ol> <p><b>**Your answer should be a binary that determines the final decision output**</b></p> |
