# Supplementary material for: Enhancing title and abstract screening for systematic reviews with GPT-3.5 turbo
Source: PubMed Central journal article supplement — BMJ Evid Based Med. 2023 Nov 21;29(1):69–70. doi: 10.1136/bmjebm-2023-112678 (PMC10850650; doi:10.1136/bmjebm-2023-112678), 2023-11-21
Supplement: bmjebm-2023-112678supp002.pdf [file bmjebm-2023-112678supp002.pdf]

| <b>Metric</b> | <b>P1</b> | <b>P2</b> | <b>P3</b> | <b>P4</b> | <b>P5</b> | <b>P6</b> | <b>P7</b> | <b>P8</b> | <b>JUN</b> | <b>SEN</b> | <b>EXP</b> |
|---------------|-----------|-----------|-----------|-----------|-----------|-----------|-----------|-----------|------------|------------|------------|
| Sensitivity   | 0.62      | 0.56      | 0.50      | 0.56      | 0.69      | 0.38      | 0.62      | 0.38      | 0.69       | 0.62       | 0.81       |
| Specificity   | 0.81      | 0.59      | 0.69      | 0.45      | 0.25      | 0.67      | 0.46      | 0.85      | 0.73       | 0.71       | 0.73       |
| F1 Score      | 0.24      | 0.12      | 0.13      | 0.09      | 0.08      | 0.09      | 0.10      | 0.17      | 0.19       | 0.17       | 0.23       |
| Accuracy      | 0.80      | 0.59      | 0.68      | 0.46      | 0.27      | 0.65      | 0.46      | 0.82      | 0.72       | 0.70       | 0.74       |

Supplementary Table2: Performance metrics of 8 prompts and three researchers
